# Supplementary material for: Differential gene expression of Asian citrus psyllids infected with ‘Ca. Liberibacter asiaticus’ reveals hyper-susceptibility to invasion by instar fourth-fifth and teneral adult stages
Source: Front Plant Sci. 2023 Aug 17;14:1229620. doi: 10.3389/fpls.2023.1229620 (PMC10470031; doi:10.3389/fpls.2023.1229620)
Supplement: Supplementary file 1 [file Table_1.xlsx]

## Sheet: 1-rawData
Additional file 1: The RNA-Seq data result of ACP 5 developmental stages
	Uninfected		Infected
	Total Bases	Read Counts	Total Bases	Read Counts
ACP instar1-2 (I12)	23067078006	152762106	28754363146	190426246
ACP instar3 (I3)	33169777400	219667400	28386510234	187990134
ACP instar4-5(I45)	30452646254	201673154	33033637612	218765812
ACP teneral adults (TA)	28160062480	186490480	28675761002	189905702
ACP post-teneral adults (PTA) or mature adults(MA)	31451174826	208285926	30822583872	204123072
	146300738966	968879066	149672855866	991210966

## Sheet: 2-up genes-top50
Additional file 2: Top 50 up-regulated genes in response to CLas infection
Stringtie transcript	BaseMean	Log2FoldChange	P-value	Dominant Stages	Shared stages (>2x)	KEGG	KEGG definition/pathway
MSTRG.16314	1428.75	6.01709	1.17982e-50	Teneral-up	I45,TA, PTA	K02183	calmodulin; Ras signaling pathway, cAMP signaling pathway, Cellular senescence, Salivary secretion, Plant-pathogen interaction etc 40 paythways,
MSTRG.3988	326.602	6.00336	1.25966e-06	Teneral-up	TA	K19720	collagen, type III, alpha;Protein digestion and absorption
MSTRG.12781	543.566	5.8225	3.21699e-18	Teneral-up	I45, TA	K12044	troponin I, cardiac muscle; cAMP signaling pathway
MSTRG.22235	179.897	5.31909	2.19793e-29	Teneral-up	TA	K05360	protein-disulfide reductase (glutathione);Glutathione metabolism
MSTRG.20872	3587.09	5.27507	3.96037e-14	Teneral-up	TA	K01195	beta-glucuronidase; Glycosaminoglycan degradation
MSTRG.23611	37.4279	5.23008	1.07362e-15	Teneral-up	TA	K22552	multicopper oxidase; Porphyrin and chlorophyll metabolism
MSTRG.17608	950.487	4.85899	5.92483e-46	Teneral-up	I45, TA, PTA	K19867	LIM domain-binding protein 3; Signaling proteins
MSTRG.16761	897.858	4.60244	1.65793e-14	Teneral-up	TA	K01183	chitinase; Amino sugar and nucleotide sugar metabolism
MSTRG.17597	399.333	4.41722	5.36582e-16	Teneral-up	TA	K01016	estrone sulfotransferase; Steroid hormone biosynthesis
MSTRG.17973	30.2483	4.38532	3.35988e-14	Teneral-up	TA	K17845	krueppel-like factor; Apelin signaling pathway
MSTRG.6609	341.365	4.37595	2.53983e-21	Teneral-up	TA	K00591	polyprenyldihydroxybenzoate methyltransferase; Ubiquinone and other terpenoid-quinone biosynthesis
MSTRG.17478	106.1	3.82208	6.07402e-06	Teneral-up	TA	K19511	peroxidase
MSTRG.11583	3580.03	3.72255	1.16662e-18	Teneral-up	TA, PTA	K19197	inhibitor of growth protein 1; Histone modification proteins
MSTRG.14581	121.806	3.55211	0.000157541	Teneral-up	TA	K22540	3-hydroxyacyl-thioester dehydratase;Fatty acid biosynthesis
MSTRG.17769	248.647	3.49483	1.59366e-16	Teneral-up	TA	K06236	collagen, type I, alpha; Focal adhesion, Relaxin signaling pathway, Protein digestion and absorption
MSTRG.10162	3329.89	3.43778	3.13684e-23	Teneral-up	TA	K01495	GTP cyclohydrolase IA; Folate biosynthesis
MSTRG.4623	30.6504	3.42218	3.27372e-06	postTen-up	TA, PTA	K01950	NAD+ synthase (glutamine-hydrolysing);
MSTRG.4782	211.411	3.37884	1.77481e-74	Teneral-up	TA	K03098	apolipoprotein D and lipocalin family protein; Exosome
MSTRG.10944	637.124	3.27641	1.92933e-10	Teneral-up	TA, PTA	K00698	chitin synthase;Amino sugar and nucleotide sugar metabolism
MSTRG.13654	18.8377	3.22332	3.84478e-19	instar3up	I12, I3, I45, TA, PTA	K12624	U6 snRNA-associated Sm-like protein LSm5; RNA degradation, Spliceosome
MSTRG.22206	2037.04	3.11604	0.0102243	Teneral-up	TA	K09542	crystallin, alpha B; Protein processing in endoplasmic reticulum
MSTRG.11089	1244.01	3.10843	1.33252e-42	Teneral-up	TA, PTA	K06237	collagen, type IV, alpha; Focal adhesion, PI3K-Akt signaling pathway
MSTRG.23862	68.0838	3.10833	6.16764e-21	Teneral-up	TA, PTA	K13348	protein Mpv17; Peroxisome
MSTRG.19867	11.6022	3.06999	5.25887e-08	instar45up	I12, I45	K22647	ubiquitin carboxyl-terminal hydrolase MINDY-3/4; Ubiquitin-specific proteases (UBPs)
MSTRG.14743	1910.41	2.89482	9.85244e-26	Teneral-up	I45, PTA	K20045	intersectin; Clathrin-mediated endocytosis/Membrane trafficking (endocytosis, exocytosis, autophage)
MSTRG.18384	31.723	2.87001	9.89767e-18	instar45up	I12, I3, I45, PTA	K01135	arylsulfatase B; arylsulfatase B,Lysosome, glycan degradation
MSTRG.10193	59.4565	2.86921	0.00340514	instar12up	I12	K04703	sprouty-related, EVH1 domain-containing protein; Protein phosphatase
MSTRG.9066	307.939	2.72542	1.40657e-15	Teneral-up	TA	K14165	atypical dual specificity phosphatase; Protein phosphatase
MSTRG.14468	215.048	2.637	3.93069e-06	Teneral-up	TA	K09855	Ras association domain-containing protein 7/8; Signaling proteins
MSTRG.9981	49.4423	2.63575	2.0464e-09	Teneral-up	I45, TA	K23497	mitochondrial mRNA pseudouridine synthase TRUB2; Mitochondrial biogenesis
MSTRG.22225	46.9308	2.62683	1.18241e-07	Teneral-up	TA	K00108	choline dehydrogenase; Glycine, serine and threonine metabolism
MSTRG.21368	417.586	2.60013	1.09357e-60	instar3up	I12, I3, I45	K02957	small subunit ribosomal protein S15Ae; Ribosome
MSTRG.4740	39.6159	2.50213	1.34515e-05	Teneral-up	TA	K18405	E3 ubiquitin-protein ligase, tudor domain-containing protein 1/4/6/7; Gene silencing
MSTRG.19181	193.989	2.50118	1.00441e-11	Teneral-up	TA	K01016	estrone sulfotransferase; Steroid hormone biosynthesis
MSTRG.4200	92.25	2.49161	1.42196e-11	Teneral-up	TA, PTA	K15734	all-trans-retinol dehydrogenase (NAD+); Retinol metabolism
MSTRG.20999	24.7841	2.46881	4.18039e-13	instar45up	I45	K07374	tubulin alpha; Phagosome
MSTRG.3208	1180.12	2.46283	2.27928e-06	Teneral-up	TA	K20056	PDZ domain-containing protein GIPC; Endocytosis/Membrane trafficking
MSTRG.19172	120.157	2.45125	4.71163e-11	Teneral-up	TA	K01488	adenosine deaminase; Purine metabolism
MSTRG.9480	260.068	2.44702	4.8928e-39	Teneral-up	TA	K23624	papilin; Peptidases and inhibitors
MSTRG.10549	18.2841	2.42516	0.00510187	instar12up	I12	K08683	3-hydroxyacyl-CoA dehydrogenase; Valine, leucine and isoleucine degradation
MSTRG.22133	1394.96	2.3988	1.05402e-65	Teneral-up	TA	K00419	ubiquinol-cytochrome c reductase subunit 9; Oxidative phosphorylation
MSTRG.10318	87.5413	2.3952	5.56978e-25	instar45up	I45	K06569	melanoma-associated antigen p97
MSTRG.20859	12.2354	2.35849	2.63788e-05	Teneral-up	TA	K15001	cytochrome P450 family 4; Drug metabolism
MSTRG.15478	50.9336	2.2567	9.90477e-06	Teneral-up	TA	K22830	essential MCU regulator, mitochondrial
MSTRG.19021	590.61	2.25349	1.41383e-11	Teneral-up	TA	K01900	succinyl-CoA synthetase beta subunit; Citrate cycle (TCA cycle); Exosome
MSTRG.20907	18517	2.23719	0.00825007	Teneral-up	TA	K03283	heat shock 70kDa protein; Endocytosis; Antigen processing and presentation; MAPK signaling pathway
MSTRG.3968	528.304	2.20975	6.33815e-14	Teneral-up	TA	K07427	docosahexaenoic acid omega-hydroxylase; Cytochrome P450
MSTRG.13495	2730.5	2.18472	1.64235e-08	Teneral-up	TA	K00501	tyrosine 3-monooxygenase; Oxidoreductases;
MSTRG.4285	46.1168	2.18359	1.98453e-18	Teneral-up	TA	K00029	malate dehydrogenase (oxaloacetate-decarboxylating)(NADP+); Energy metabolism (Carbon fixation)
MSTRG.4446	41.0424	2.18236	2.26245e-05	Teneral-up	TA	K16500	protocadherin-15; Cell adhesion molecules

## Sheet: 3-down genes-top50
Additional file 3: Top 50 down-regulated genes in response to CLas infection
Stringtie transcript	BaseMean	Log2FoldChange	P-value	Dominant Stages	Shared stages	KEGG	KEGG definition/pathway
MSTRG.2530	125.764	-2.4661	0.0111984	Teneral-down	I3, TA	K07253	phenylpyruvate tautomerase; Phenylalanine metabolism, signaling and cellular processes
MSTRG.15374	17.6444	-2.2659	9.0443e-07	Teneral-down	TA	K04224	tachykinin receptor 3; Calcium signaling pathway
MSTRG.14933	34.2933	-1.85689	4.43246e-15	instar3down	I12, I3	K01052	lysosomal acid lipase/cholesteryl ester hydrolase; Lipid metabolism
MSTRG.19362	37.6443	-1.82308	0.000499292	postTen-down	PTA	K07378	neuroligin; Cell adhesion molecules, Calcium ion-dependent exocytosis/Membrane trafficking
MSTRG.7935	25.4739	-1.8065	0.000966245	Teneral-down	TA	K15189	protein HEXIM1/2; transcription-related factors
MSTRG.11886	93.1325	-1.76473	0.00245255	instar45down	I45	K06240	laminin, alpha 3/5; Focal adhesion
MSTRG.19026	47.8757	-1.76461	5.98922e-15	instar3down	I3	K17623	pseudouridine 5'-phosphatase; Protein phosphatases
MSTRG.21760	15.4569	-1.74873	2.47852e-07	instar45down	I45	K16599	tubulin polyglutamylase TTLL1; Cytoskeleton proteins
MSTRG.6650	88.7579	-1.72405	1.73827e-32	instar3down	I3	K04661	follistatin; TGF-beta signaling pathway
MSTRG.9206	1732.35	-1.69164	4.20435e-07	Teneral-down	TA	K09640	transmembrane protease serine 9; Peptidases and inhibitors
MSTRG.13857	45.5027	-1.58591	1.56208e-17	instar3down	I12, I3, I45	K23209	DNA transposase THAP9; Gene silencing
MSTRG.16337	63.8145	-1.57836	0.0134606	instar12down	I12	K06820	plexin A; Development and regeneration
MSTRG.12467	43.7442	-1.57396	1.19137e-06	instar3down	I12, I3	K03845	alpha-1,3-mannosyltransferase; N-Glycan biosynthesis
MSTRG.22873	11.9127	-1.55982	1.47071e-05	instar12down	I12	K04082	molecular chaperone HscB; Heat shock proteins
MSTRG.14309	426.592	-1.55147	2.69803e-40	Teneral-down	TA	K01128	sphingomyelin phosphodiesterase acid-like 3; Phosphoric-diester hydrolases
MSTRG.18845	518.033	-1.52468	0.000195962	postTen-down	PTA	K01092	myo-inositol-1(or 4)-monophosphatase; Phosphatidylinositol signaling system
MSTRG.5380	23.8501	-1.52392	1.83422e-05	instar12down	I12	K10411	dynein light chain 1, axonemal; cytoskeleton proteins
MSTRG.22206	39.3151	-1.52381	0.000630619	postTen-down	I12, I3, PTA	K09542	crystallin, alpha B; Heat shock proteins
MSTRG.21816	22.7202	-1.51995	2.18902e-08	instar45down	I3, I45	K01446	peptidoglycan recognition protein; Toll and Imd signaling pathway
MSTRG.5179	33.605	-1.50394	6.22777e-05	postTen-down	TA, PTA	K06890	uncharacterized protein
MSTRG.11276	21.7807	-1.49026	0.00222578	postTen-down	PTA	K09228	KRAB domain-containing zinc finger protein; Transcription factors
MSTRG.21012	1840.57	-1.47766	1.3821e-10	Teneral-down	TA	K14843	pescadillo; Ribosome biogenesis
MSTRG.3032	23.4654	-1.47444	1.18939e-09	instar12down	I12, I45	K19760	dynein assembly factor with WDR repeat domains 1; cytoskeleton proteins
MSTRG.17033	26.5351	-1.46577	0.00964303	Teneral-down	TA	K01283	peptidyl-dipeptidase A ; Peptidases and inhibitors
MSTRG.7808	100.524	-1.44759	0.000395595	Teneral-down	TA	K14840	nucleolar protein 53; Ribosome biogenesis
MSTRG.9224	13.0782	-1.4387	4.34751e-05	instar12down	I12	K10413	dynein heavy chain 1, cytosolic; cytoskeleton proteins
MSTRG.3409	52.1507	-1.40718	7.5042e-16	instar3down	I3	K23413	anosmin-1; Peptidase inhibitors
MSTRG.17346	152.863	-1.39393	2.56943e-13	Teneral-down	I12, I3, I45, TA	K15378	solute carrier family 45, member 1/2/4; H+/sugar cotransporter
MSTRG.20687	63.2666	-1.38424	3.62837e-12	Teneral-down	TA	K23624	papilin; Peptidase inhibitors
MSTRG.15083	890.175	-1.38386	1.62837e-132	instar3down	I12, I3	K00799	glutathione S-transferase; Metabolism of xenobiotics by cytochrome P450
MSTRG.21346	4091.27	-1.35441	0.000937295	Teneral-down	I45, TA	K18758	DIS3-like exonuclease 2 ; mRNA surveillance and transport factors
MSTRG.10977	105.005	-1.34871	1.05222e-13	instar45down	I45	K19625	retinaldehyde-binding protein 1; Amino acid metabolism
MSTRG.21105	51.5794	-1.34807	9.6157e-09	instar12down	I12	K06775	neuronal growth regulator 1; Cell adhesion molecules (CAMs)
MSTRG.20907	672.652	-1.33959	1.32167e-84	instar3down	I3, PTA	K03283	heat shock 70kDa protein 1/2/6/8; MAPK signaling pathway, Endocytosis
MSTRG.6987	11.2477	-1.33924	0.00515866	Teneral-down	TA	K21396	ATP-binding cassette, subfamily G; ABC transporters
MSTRG.24935	264.127	-1.32683	1.71225e-41	instar45down	I45	K06259	CD36 antigen; AMPK signaling pathway,
MSTRG.15385	58.771	-1.32459	2.45449e-13	Teneral-down	TA	K08202	MFS transporter; Transporters
MSTRG.7309	22.9419	-1.32315	4.24948e-06	instar12down	I12, I3	K16781	tetratricopeptide repeat protein 8; Centrosome formation and ciliogenesis proteins
MSTRG.4833	1408.45	-1.31767	8.85446e-12	Teneral-down	I45, TA	K19465	mitochondrial genome maintenance exonuclease 1 ; Mitochondrial DNA replication factors
MSTRG.16067	14.5766	-1.3134	0.0139638	instar3down	I3, I45	K00683	glutaminyl-peptide cyclotransferase; Peptidases and inhibitors
MSTRG.21340	12.5958	-1.30569	0.000692198	Teneral-down	TA	K11982	E3 ubiquitin-protein ligase RNF115/126; Lysosome transport/Membrane trafficking
MSTRG.21929	33.7309	-1.28818	2.24333e-07	instar45down	I12, I3, I45	K15984	16S rRNA; Ribosome biogenesis
MSTRG.21743	2952.99	-1.28607	1.7163e-108	instar3down	I12, I3, I45	K00008	L-iditol 2-dehydrogenase; Fructose and mannose metabolism
MSTRG.12883	230.994	-1.28596	6.33139e-11	Teneral-down	TA	K01768	adenylate cyclase; Biofilm formation; Longevity regulating pathway
MSTRG.7898	10.8434	-1.28044	0.00184747	Teneral-down	TA	K05312	nicotinic acetylcholine receptor; signaling and cellular processes
MSTRG.21368	703.247	-1.27384	1.44715e-05	Teneral-down	TA	K02957	small subunit ribosomal protein S15Ae; Ribosome
MSTRG.19721	405.576	-1.26796	1.25328e-10	Teneral-down	TA	K03032	26S proteasome regulatory subunit N2; Proteasome
MSTRG.21126	18.7959	-1.26203	5.3739e-05	instar3down	I3	K08802	SNF related kinase; Protein kinases
MSTRG.23000	559.651	-1.25816	1.84506e-70	instar45down	I45	K20791	N-alpha-acetyltransferase; chromatid cohesion factors
MSTRG.21122	1089.71	-1.24884	3.11445e-54	instar45down	I45	K14085	aldehyde dehydrogenase family 7 member A1; Glycolysis / Gluconeogenesis

## Sheet: 4-up-interStage-top50
Additional file 4: Top 50 interStage up-regulated genes in response to CLas infection
Stringtie transcript	BaseMean	Log2FoldChange	P-value	Dominant Stages	Shared stages	KEGG	KEGG definition	KEGG pathway
MSTRG.18581	1015.5	11.116	6.54127e-79	instar45-3up		K10345	SPRY domain-containing SOCS box protein 3 (AHRD V3.11 *** tr|A0A0A9YWF3|A0A0A9YWF3_LYGHE)	Ubiquitin system
MSTRG.15367	977.242	10.8374	4.8258e-86	instar45-3up		K12163	AN1-type zinc finger and ubiquitin domain-containing protein 1	Ubiquitin system
MSTRG.10226	799.605	10.7612	1.95083e-65	instar45-3up		K10419	dynein light chain roadblock-type;	bacterial infection; Membrane trafficking; Cytoskeleton proteins-Tubulin-binding proteins
MSTRG.6586	795.435	10.7493	1.79038e-61	instar45-3up		K02738	20S proteasome subunit beta 1	immunological processing of endogenous antigens
MSTRG.16443	781.252	10.7312	1.5733e-67	instar45-3up		K11982	E3 ubiquitin-protein ligase RNF115/126	Ubiquitin system; Membrane trafficking
MSTRG.9021	784.023	10.7308	3.90285e-63	instar45-3up		K09554	cell division cycle protein 37	Hsp90 is an ATP-dependent molecular chaperone, which facilitates the activation and stabilization of hundreds of client proteins in cooperation with a defined set of cofactors. Many client proteins are protein kinases, which are activated and stabilized by Hsp90 in cooperation with the kinase-specific co-chaperone Cdc37.
MSTRG.12781	749.41	10.6715	1.76617e-67	instar45-3up		K12044	Troponins;	Actin-binding proteins; Cytoskeleton proteins
MSTRG.5176	747.539	10.6674	3.12103e-67	instar45-3up		K06890	Bax inhibitor 1-like protein	uncharacterized protein
MSTRG.17164	851.199	10.6395	1.35389e-83	instar45-3up		K08811	Testis-specific serine/threonine-protein kinase 1 (AHRD V3.11 *** tr|A0A0A9XXL5|A0A0A9XXL5_LYGHE) | IPR000719,PF00069,GO:0004672,GO:0005524,GO:0006468	Protein kinases
MSTRG.5641	712.704	10.6008	1.4286e-67	instar45-3up		K15409	serine/threonine-protein kinase SRPK1	Protein kinases
MSTRG.8429	710.383	10.5899	1.3066e-62	instar45-3up		K13577	solute carrier family 25 (mitochondrial dicarboxylate transporter);
MSTRG.8986	718.676	10.5806	4.03844e-44	instar45-3up		K04739	cAMP-dependent protein kinase regulator;	Insulin signaling pathway
MSTRG.9444	701.995	10.5726	1.95477e-62	instar45-3up	I45/I3; TA/I45	K16608	tubulin monoglycylase TTLL3/8	Cytoskeleton proteins
MSTRG.12680	688.41	10.5454	6.6387e-63	instar45-3up		K07953	GTP-binding protein SAR1	Membrane trafficking
MSTRG.4071	679.914	10.5282	3.63143e-63	instar45-3up		K02150	V-type H+-transporting ATPase subunit E	Phagosome
MSTRG.20422	677.604	10.5215	6.0129e-62	instar45-3up		K07767	katanin p60 ATPase-containing subunit A1	Cytoskeleton proteins
MSTRG.13350	680.719	10.5113	1.99844e-49	instar45-3up		K10418	dynein light chain roadblock-type;	bacterial infection; Membrane trafficking; Cytoskeleton proteins-Tubulin-binding proteins
MSTRG.22822	664.058	10.4841	5.65399e-55	instar45-3up		K03679	Pyrazinamidase/nicotinamidase	mRNA degradation
MSTRG.3824	655.402	10.4729	6.73394e-61	instar45-3up		K20028	palmitoyltransferase	Membrane trafficking
MSTRG.6426	628.214	10.4124	2.2597e-60	instar45-3up	I45/I3; TA/I45	K05312	Acetylcholine receptor subunit alpha-like	Ion channels
MSTRG.10473	623.474	10.3956	3.79106e-56	instar45-3up		K01099	inositol polyphosphate 5-phosphatase INPP5B/F	Exocytosis; Endocytosis; Membrane trafficking
MSTRG.13537	620.82	10.3668	4.75661e-41	instar45-3up		K19347	SUN domain-containing protein	Chromosome and associated proteins
MSTRG.8015	584.353	10.2791	4.02341e-40	instar45-3up		K00164	2-oxoglutarate dehydrogenase E1 component	Citrate cycle (TCA cycle)
MSTRG.5536	580.688	10.2577	1.77125e-33	instar45-3up		K11251	Histone H2A	Necroptosis
MSTRG.6540	539.753	10.1901	7.12273e-56	instar45-3up		K02264	cytochrome c oxidase subunit 5a	Energy metabolism
MSTRG.11677	553.194	10.1764	8.66754e-28	instar45-3up		K03671	thioredoxin 1	Immune system/NOD-like receptor signaling pathway
MSTRG.23019	542.134	10.1486	3.64646e-28	instar45-3up		K08957	Casenin Kinase 1-like	Wnt signaling pathway
MSTRG.17394	520.254	10.0856	2.2102e-26	instar45-3up		K02727	20S proteasome subunit alpha 7	Proteasome
MSTRG.8746	580.661	10.039	2.69141e-39	instar45-3up		K14688	Cation efflux protein/zinc transporter	Transporters
MSTRG.11673	493.063	10.0284	2.02185e-35	instar45-3up		K20196	kinesin family member 3B	cytoskeleton proteins
MSTRG.14501	480.473	10.0124	1.94849e-47	instar45-3up		K02737	20S proteasome subunit beta 5	Proteasome
MSTRG.24355	488.191	10.0062	1.21913e-31	instar45-3up		K22182	Glutathione reductase (	thioredoxin reductase (NADPH)
MSTRG.15178	507.164	9.99511	1.92453e-59	teneral-45up		K04348	Serine/threonine-protein phosphatase	Calcium signaling pathway
MSTRG.21113	456.467	9.9486	2.24558e-53	instar45-3up		K10576	ubiquitin-conjugating enzyme E2 H	Ubiquitin mediated proteolysis
MSTRG.12812	457.07	9.69487	5.88909e-38	instar45-3up		K14327	regulator of nonsense transcripts 2	RNA transport
MSTRG.8056	975.949	4.15208	0.0036321	instar45-3up		K01312	Transmembrane protease serine 11B	trypsin; Peptidases and inhibitors
MSTRG.11895	977.174	3.72475	2.83493e-07	instar3-12up		K04874	Potassium voltage-gated channel protein Shaker	Ion channels
MSTRG.6706	930.026	3.60148	4.59071e-11	instar3-12up		K22656	immunoglobulin superfamily member 9B	Cell adhesion molecules
MSTRG.21155	680.509	3.58401	3.19909e-07	teneral-45up		K09228	KRAB domain-containing zinc finger protein	Transcription factors
MSTRG.4484	737.104	3.36575	1.19071e-08	teneral-45up		K22860	REM2-and Rab-like small GTPase 1	Chromosome and associated proteins
MSTRG.6489	686.872	3.26156	3.99906e-08	teneral-45up		K16507	protocadherin-16/23	Hippo signaling pathway - fly
MSTRG.8304	943.35	3.25594	3.31757e-05	instar3-12up		K18411	Protein maelstrom	Gene silencing
MSTRG.19546	779.603	3.24878	0.000151221	instar3-12up		K06676	condensin complex subunit 2	Cell growth and death
MSTRG.15690	991.288	3.19632	2.2376e-05	instar3-12up		K10802	high mobility group protein B1	Autophagy
MSTRG.7873	1008.81	3.15845	9.76546e-08	instar3-12up		K02324	DNA polymerase epsilon catalytic subunit	DNA repair and recombination
MSTRG.5424	1125.35	3.10564	0.000356004	instar45-3up		K14427	Cation-chloride cotransporter 1	Transporters
MSTRG.20724	798.018	3.09796	7.74836e-05	instar3-12up		K09198	transcription factor Sp8	Transcription factors
MSTRG.15634	878.31	3.09591	1.36668e-06	teneral-45up		K12948	Signal peptidase complex subunit 3	Protein export
MSTRG.6183	1058.58	3.06784	2.87882e-05	instar3-12up		K07523	Leucine-rich repeat neuronal protein 3	Cell adhesion molecules
MSTRG.12840	863.831	3.06533	7.87209e-07	instar3-12up		K11374	Elongator complex protein 2	Histone modification proteins

## Sheet: 5-down-interStage-top50
Additional file 5: Top 50 interStage down-regulated genes in response to CLas infection
Stringtie transcript	BaseMean	Log2FoldChange	P-value	Dominant Stages	Shared stages	KEGG	KEGG definition	KEGG pathway
MSTRG.5048	1073.29	-2.53046	0.000979449	instar3-12down		K09364	POU domain protein	Transcription factors
MSTRG.8392	1144.23	-3.79656	8.61762e-14	instar45-3down		K04814	nicotinic acetylcholine receptor beta-3	Acetylcholine/Ion channels
MSTRG.21155	859.581	-3.75882	6.90539e-07	instar45-3down		K09228	KRAB domain-containing zinc finger protein	Transcription factors
MSTRG.14637	830.491	-3.54071	1.13171e-06	instar45-3down		K05402	toll-interacting protein	Toll-like receptor signaling pathway/Immune system
MSTRG.4066	771.421	-3.45024	0.000391529	instar45-3down		K04986	Polycystin-2	Ion channels
MSTRG.6512	1041.65	-3.3804	8.86156e-09	instar45-3down		K02916	39S ribosomal protein L35, mitochondrial	Ribosome
MSTRG.13428	1064.77	-3.34041	2.01111e-06	instar45-3down		K06846	lymphocyte antigen 6 complex locus protein	Glycosylphosphatidylinositol (GPI)-anchored proteins
MSTRG.12605	894.615	-3.25565	0.000489617	instar45-3down		K07579	S-adenosyl-L-methionine-dependent methyltransferase	putative methylase
MSTRG.18660	912.363	-3.06611	7.39225e-05	instar45-3down		K09250	Zinc knuckle domain protein	Transcription factors
MSTRG.679	955.071	-2.93853	0.000222452	instar45-3down		K07831	Ras-related protein M-Ras	Ras signaling pathway/Autophagy
MSTRG.22431	1103.31	-2.91663	1.28809e-05	instar45-3down		K03958	NADH dehydrogenase	Oxidative phosphorylation
MSTRG.2574	916.098	-2.74817	4.51627e-06	instar45-3down		K09090	hairy and enhancer of split	Transcription factors (bHLH)
MSTRG.7199	1127.78	-2.74763	2.84953e-09	instar45-3down		K07583	tRNA pseudouridine synthase	tRNA modification factors
MSTRG.7728	1112.63	-2.72468	6.14498e-07	instar45-3down		K00522	ferritin heavy chain	Necroptosis, Exosome
MSTRG.3725	1025.86	-2.69482	4.95767e-05	instar45-3down		K01265	Methionine aminopeptidase 2	Peptidases and inhibitors
MSTRG.3500	981.635	-2.67879	3.82974e-05	instar45-3down		K02923	large subunit ribosomal protein L38e	Ribosome
MSTRG.13949	943.147	-2.65276	0.000416961	instar45-3down		K07890	Ras-related protein Rab-21	Membrane trafficking/exosome
MSTRG.17226	762.561	-2.60603	0.00133266	instar45-3down		K03239	Translation initiation factor eIF-2B subunit alpha	Translation factors
MSTRG.15805	978.377	-2.57002	5.57495e-05	instar45-3down		K01052	Lipase	Lipid metabolism/lysosome
MSTRG.18096	970.634	-2.54172	0.000490404	instar45-3down		K06508	Tetraspanin	exosome
MSTRG.1317	988.874	-2.52407	0.000446184	instar45-3down		K02911	large subunit ribosomal protein L32	Ribosome
MSTRG.4331	1047.64	-2.41436	4.10924e-05	instar45-3down		K02921	large subunit ribosomal protein L37Ae	Ribosome
MSTRG.4604	911.594	-2.37925	0.00127841	instar45-3down		K03934	NADH dehydrogenase (ubiquinone) Fe-S protein 1	Energy metabolism/Oxidative phosphorylation
MSTRG.18679	597.463	-2.37202	0.000918228	instar45-3down		K01008	water dikinase	tRNA modification factors
MSTRG.18093	850.84	-2.34928	0.000210499	instar45-3down		K06268	serine/threonine-protein phosphatase 2B regulatory subunit	Calcium signaling pathway/Immune system
MSTRG.3125	748.808	-2.31314	0.000422554	instar45-3down		K08705	Nucleoside diphosphate kinase	Transcription factors
MSTRG.8690	809.936	-2.31304	0.000550376	instar45-3down		K01834	2,3-bisphosphoglycerate-dependent phosphoglycerate mutase	Energy metabolism, Membrane trafficking, Exosome
MSTRG.5785	978.883	-2.29007	0.0018584	instar45-3down		K02127	ATPase subunit b	Energy metabolism/Oxidative phosphorylation
MSTRG.11216	821.969	-2.28534	0.00229676	instar45-3down		K01759	Lactoylglutathione lyase	Carbohydrate metabolism
MSTRG.15772	830.985	-2.26385	0.00224641	instar45-3down		K03102	squid	Spliceosome
MSTRG.8233	1148.64	-2.24227	0.000288504	instar45-3down		K01885	glutamyl-tRNA synthetase	Prokaryotic defense system/Toxin-antitoxin system (TA system)
MSTRG.3319	850.999	-2.21975	0.00579283	instar45-3down		K05687	Protein DJ-1 B-like	Peptidases and inhibitors/exosome
MSTRG.4664	1083.31	-2.21825	0.000658534	instar45-3down		K00254	dihydroorotate dehydrogenase	Oxidoreductases
MSTRG.6745	965.907	-2.18893	0.000126041	instar45-3down		K10268	F-box/LRR-repeat protein 20	Ubiquitin system
MSTRG.20126	886.456	-2.14181	0.000317079	instar45-3down		K01836	phosphoacetylglucosamine mutase	Amino sugar and nucleotide sugar metabolism
MSTRG.3807	1154.87	-2.13169	1.6615e-06	instar45-3down		K01307	Gamma-glutamyl hydrolase	Peptidases and inhibitors
MSTRG.11700	788.728	-2.09921	0.0027771	instar45-3down		K03233	elongation factor 1-gamma	Elongation factors/Trans-acting binding proteins
MSTRG.8811	895.643	-2.09377	0.00404237	instar45-3down		K01262	Xaa-Pro aminopeptidase	Peptidases and inhibitors
MSTRG.18818	964.108	-2.08857	0.000401452	instar45-3down		K00261	glutamate dehydrogenase	Necroptosis
MSTRG.2706	1004.54	-2.07359	0.00300336	instar45-3down		K08597	sentrin-specific protease 8	Peptidases and inhibitors/Deubiquitinating enzyme/Ubiquitin system
MSTRG.10304	883.64	-2.06095	0.00525179	instar45-3down		K03264	Eukaryotic translation initiation factor 6	Translation factors
MSTRG.8099	1042.35	-2.05829	0.00119909	instar45-3down		K01899	Succinate--CoA ligase [ADP-forming] subunit alpha, mitochondrial
MSTRG.9456	954.632	-2.05714	0.00164921	instar45-3down		K02988	30S ribosomal S5	Ribosome
MSTRG.10877	655.925	-2.38139	2.78546e-05	postTen-Ten-down		K08017	Villin	Cytoskeleton proteins/Actin-binding proteins
MSTRG.12765	787.67	-2.34578	1.36846e-05	postTen-Ten-down		K03138	transcription initiation factor TFIIF subunit alpha	transcription factor
MSTRG.12121	784.896	-2.20387	1.38447e-05	postTen-Ten-down		K03122	transcription initiation factor TFIIA large subunit	transcription factor
MSTRG.18408	734.823	-10.7421	8.89841e-69	teneral-45down		K09067	achaete-scute complex protein	Transcription factors
MSTRG.13822	579.914	-10.3786	2.91494e-48	teneral-45down		K07418	Cytochrome P450	Oxidoreductases
MSTRG.3334	544.338	-10.0803	6.1447e-57	teneral-45down		K09381	paired box protein 3/7	Transcription factors
MSTRG.20008	1026.4	-2.29879	0.000729191	teneral-45down		K09353	homeobox protein LBX	Transcription factors

## Sheet: 6-ATP synthase and ATPase
Additional file 6: ATP synthase and ATase genes in response to CLas infection
Stringtie transcript	OGS ID	KEGG	Annotation	baseMean	log2FoldChange	pvalue	note
MSTRG.23375	Dcitr12g05200.1.1		ATP synthase gamma chain (AHRD V3.11 *** tr|D1MBQ8|D1MBQ8_BURXY) | IPR000131,PF00231,GO:0015986,GO:0045261,GO:0046933	137.034	1.34779	1.91706e-06	Teneral-up
MSTRG.11595	Dcitr04g15310.1.1	K07556	ATP synthase mitochondrial F1 complex assembly factor 2 (AHRD V3.11 *-* tr|A0A0A9WGC8|A0A0A9WGC8_LYGHE)	48.0122	1.06928	2.68102e-05	Teneral-up
MSTRG.7849	Dcitr03g04320.1.1	K02131	ATP synthase-coupling factor 6, mitochondrial (AHRD V3.11 *** tr|A0A0A9XJP8|A0A0A9XJP8_LYGHE) | IPR008387,PF05511,GO:0000276,GO:0015078,GO:0015986	848.899	0.890507	4.2424e-06	teneral-45up
MSTRG.23373	Dcitr12g05170.1.1	K02136	ATP synthase gamma chain (AHRD V3.11 *** tr|D1MBQ8|D1MBQ8_BURXY) | IPR000131,PF00231,GO:0015986,GO:0045261,GO:0046933	6080.07	0.733683	0.000631291	Teneral-up
MSTRG.5785	Dcitr02g07330.1.1	K02127	ATP synthase subunit b, mitochondrial (AHRD V3.11 *** tr|A0A0A9YXA2|A0A0A9YXA2_LYGHE) | IPR008688,PF05405,GO:0000276,GO:0015078,GO:0015986	9630.21	0.728066	5.30666e-06	Teneral-up
MSTRG.23355	Dcitr12g04920.1.1	K02138	ATP synthase subunit d, mitochondrial (AHRD V3.11 *** tr|A0A0A9WLZ3|A0A0A9WLZ3_LYGHE) | IPR008689,PF05873,GO:0000276,GO:0015078,GO:0015986	9220.71	0.676136	7.58112e-06	Teneral-up
MSTRG.16322	Dcitr07g04350.1.1	K02130	ATP synthase subunit f, mitochondrial (AHRD V3.11 *** sp|P56134|ATPK_HUMAN) | IPR019344,PF10206	3974.45	0.596836	0.000453556	Teneral-up
MSTRG.12937	Dcitr05g09170.1.1	K02137	ATP synthase delta subunit (AHRD V3.11 *** tr|A0A1T3CFI7|A0A1T3CFI7_9HYPO)	6785.79	0.569013	0.000366048	Teneral-up
MSTRG.5317	Dcitr02g03430.1.1	K02140	ATP synthase subunit g, mitochondrial (AHRD V3.11 *** tr|A0A0A9VU16|A0A0A9VU16_LYGHE) | IPR006808,PF04718,GO:0000276,GO:0015078,GO:0015986	4680.52	0.557409	0.000166285	Teneral-up
MSTRG.7488	Dcitr03g01480.1.1	K02129	ATP synthase subunit e, mitochondrial (AHRD V3.11 -** tr|A0A0A9X632|A0A0A9X632_LYGHE) | IPR008386,PF05680,GO:0000276,GO:0015078,GO:0015986	1048.71	0.547422	0.000899309	teneral-45up
MSTRG.7488	Dcitr03g01480.1.1	K02129	ATP synthase subunit e, mitochondrial (AHRD V3.11 -** tr|A0A0A9X632|A0A0A9X632_LYGHE) | IPR008386,PF05680,GO:0000276,GO:0015078,GO:0015986	2498.41	0.481989	0.00431126	Teneral-up
MSTRG.11595	Dcitr04g15310.1.1	K07556	ATP synthase mitochondrial F1 complex assembly factor 2 (AHRD V3.11 *-* tr|A0A0A9WGC8|A0A0A9WGC8_LYGHE)	1719.9	0.45501	7.41494e-09	instar45-3up
MSTRG.16322	Dcitr07g04350.1.1	K02130	ATP synthase subunit f, mitochondrial (AHRD V3.11 *** sp|P56134|ATPK_HUMAN) | IPR019344,PF10206	1294.71	0.41254	0.000141127	instar45-3up
MSTRG.5317	Dcitr02g03430.1.1	K02140	ATP synthase subunit g, mitochondrial (AHRD V3.11 *** tr|A0A0A9VU16|A0A0A9VU16_LYGHE) | IPR006808,PF04718,GO:0000276,GO:0015078,GO:0015986	1405.56	0.404183	1.88236e-06	instar45-3up
MSTRG.23355	Dcitr12g04920.1.1	K02138	ATP synthase subunit d, mitochondrial (AHRD V3.11 *** tr|A0A0A9WLZ3|A0A0A9WLZ3_LYGHE) | IPR008689,PF05873,GO:0000276,GO:0015078,GO:0015986	9498.73	0.36989	0.000434153	postTen-up
MSTRG.12937	Dcitr05g09170.1.1	K02137	ATP synthase delta subunit (AHRD V3.11 *** tr|A0A1T3CFI7|A0A1T3CFI7_9HYPO)	7599.89	0.35031	0.00299372	postTen-up
MSTRG.5309	Dcitr02g03430.1.1		ATP synthase subunit g, mitochondrial (AHRD V3.11 *** tr|A0A0A9VU16|A0A0A9VU16_LYGHE) | IPR006808,PF04718,GO:0000276,GO:0015078,GO:0015986	1499.4	0.346097	5.44178e-08	instar45-3up
MSTRG.5785	Dcitr02g07330.1.1	K02127	ATP synthase subunit b, mitochondrial (AHRD V3.11 *** tr|A0A0A9YXA2|A0A0A9YXA2_LYGHE) | IPR008688,PF05405,GO:0000276,GO:0015078,GO:0015986	9854.52	0.322592	3.17253e-05	postTen-up
MSTRG.23373	Dcitr12g05170.1.1	K02136	ATP synthase gamma chain (AHRD V3.11 *** tr|D1MBQ8|D1MBQ8_BURXY) | IPR000131,PF00231,GO:0015986,GO:0045261,GO:0046933	6040.59	0.293967	0.00257275	postTen-up
MSTRG.7849	Dcitr03g04320.1.1	K02131	ATP synthase-coupling factor 6, mitochondrial (AHRD V3.11 *** tr|A0A0A9XJP8|A0A0A9XJP8_LYGHE) | IPR008387,PF05511,GO:0000276,GO:0015078,GO:0015986	1556.09	0.27687	4.8844e-09	instar3up
MSTRG.5309	Dcitr02g03430.1.1	K02140	ATP synthase subunit g, mitochondrial (AHRD V3.11 *** tr|A0A0A9VU16|A0A0A9VU16_LYGHE) | IPR006808,PF04718,GO:0000276,GO:0015078,GO:0015986	1217.25	0.273826	0.00107487	instar3-12up
MSTRG.3805	Dcitr01g13450.1.2	K07554	ATP synthase subunit s, mitochondrial (AHRD V3.11 *** tr|A0A0A9YBW0|A0A0A9YBW0_LYGHE)	1496.93	0.268497	9.68439e-05	instar45-3up
MSTRG.7488	Dcitr03g01480.1.1	K02129	ATP synthase subunit e, mitochondrial (AHRD V3.11 -** tr|A0A0A9X632|A0A0A9X632_LYGHE) | IPR008386,PF05680,GO:0000276,GO:0015078,GO:0015986	2038.48	0.249586	9.46877e-06	instar3up
MSTRG.7488	Dcitr03g01480.1.1	K02129	ATP synthase subunit e, mitochondrial (AHRD V3.11 -** tr|A0A0A9X632|A0A0A9X632_LYGHE) | IPR008386,PF05680,GO:0000276,GO:0015078,GO:0015986	1768.21	0.202981	0.00030948	instar12up
MSTRG.11588	Dcitr04g15350.1.1	K07556	ATP synthase mitochondrial F1 complex assembly factor 2 (AHRD V3.11 *** tr|A0A0A9WGC8|A0A0A9WGC8_LYGHE)	1492.75	0.183464	0.0015966	instar3up
MSTRG.7849	Dcitr03g04320.1.1	K02131	ATP synthase-coupling factor 6, mitochondrial (AHRD V3.11 *** tr|A0A0A9XJP8|A0A0A9XJP8_LYGHE) | IPR008387,PF05511,GO:0000276,GO:0015078,GO:0015986	1307.98	0.178664	0.00243879	instar12up
MSTRG.24675	Dcitr13g05350.1.1	K02132	ATP synthase subunit alpha (AHRD V3.11 *** tr|A0A146KQL2|A0A146KQL2_LYGHE)	9906.7	0.132064	0.0187328	instar45up
MSTRG.24675	Dcitr13g05350.1.1	K02132	ATP synthase subunit alpha (AHRD V3.11 *** tr|A0A146KQL2|A0A146KQL2_LYGHE)	11393.6	0.115996	0.00970601	instar12up
MSTRG.12937	Dcitr05g09170.1.1	K02137	ATP synthase delta subunit (AHRD V3.11 *** tr|A0A1T3CFI7|A0A1T3CFI7_9HYPO)	6742.86	0.112515	0.0116273	instar3up
MSTRG.5785	Dcitr02g07330.1.1	K02127	ATP synthase subunit b, mitochondrial (AHRD V3.11 *** tr|A0A0A9YXA2|A0A0A9YXA2_LYGHE) | IPR008688,PF05405,GO:0000276,GO:0015078,GO:0015986	8894.91	0.108771	0.00547659	instar3up
MSTRG.5309	Dcitr02g03430.1.1	K02140	ATP synthase subunit g, mitochondrial (AHRD V3.11 *** tr|A0A0A9VU16|A0A0A9VU16_LYGHE) | IPR006808,PF04718,GO:0000276,GO:0015078,GO:0015986	3265.27	0.105557	0.0171184	instar3up
MSTRG.17370	Dcitr07g12160.1.1	K02128	ATP synthase subunit 9, mitochondrial (AHRD V3.11 --* sp|Q0H8W9|ATP9_USTMA)	29288.7	-0.112366	0.000183723	instar45down
MSTRG.7849	Dcitr03g04320.1.1	K02131	ATP synthase-coupling factor 6, mitochondrial (AHRD V3.11 *** tr|A0A0A9XJP8|A0A0A9XJP8_LYGHE) | IPR008387,PF05511,GO:0000276,GO:0015078,GO:0015986	1843.3	-0.134099	0.0112594	instar45down
MSTRG.5317	Dcitr02g03430.1.1	K02140	ATP synthase subunit g, mitochondrial (AHRD V3.11 *** tr|A0A0A9VU16|A0A0A9VU16_LYGHE) | IPR006808,PF04718,GO:0000276,GO:0015078,GO:0015986	3229.71	-0.159228	0.00598023	instar3down
MSTRG.16322	Dcitr07g04350.1.1	K02130	ATP synthase subunit f, mitochondrial (AHRD V3.11 *** sp|P56134|ATPK_HUMAN) | IPR019344,PF10206	4234.38	-0.200453	0.00516303	instar45down
MSTRG.16322	Dcitr07g04350.1.1	K02130	ATP synthase subunit f, mitochondrial (AHRD V3.11 *** sp|P56134|ATPK_HUMAN) | IPR019344,PF10206	3029.65	-0.21647	0.000454617	instar3down
MSTRG.5309	Dcitr02g03430.1.1	K02140	ATP synthase subunit g, mitochondrial (AHRD V3.11 *** tr|A0A0A9VU16|A0A0A9VU16_LYGHE) | IPR006808,PF04718,GO:0000276,GO:0015078,GO:0015986	2463.08	-0.272258	3.74202e-08	instar12down
MSTRG.11595	Dcitr04g15310.1.1	K07556	ATP synthase mitochondrial F1 complex assembly factor 2 (AHRD V3.11 *-* tr|A0A0A9WGC8|A0A0A9WGC8_LYGHE)	78.9383	-0.34588	0.0167718	instar45down
MSTRG.23375	Dcitr12g05200.1.1	K02136	ATP synthase gamma chain (AHRD V3.11 *** tr|D1MBQ8|D1MBQ8_BURXY) | IPR000131,PF00231,GO:0015986,GO:0045261,GO:0046933	79.1276	-0.395454	0.0171951	instar45down
MSTRG.23375	Dcitr12g05200.1.1	K02136	ATP synthase gamma chain (AHRD V3.11 *** tr|D1MBQ8|D1MBQ8_BURXY) | IPR000131,PF00231,GO:0015986,GO:0045261,GO:0046933	62.6354	-0.418969	0.0114728	instar12down
MSTRG.11595	Dcitr04g15310.1.1	K07556	ATP synthase mitochondrial F1 complex assembly factor 2 (AHRD V3.11 *-* tr|A0A0A9WGC8|A0A0A9WGC8_LYGHE)	48.9464	-0.619903	0.00100121	instar3down
MSTRG.5785	Dcitr02g07330.1.1	K02127	ATPase subunit b	978.883	-2.29007	0.0018584	instar45-3down

## Sheet: 7-ubiquitin-proteasome
Additional file 7: Ubiquitin-proteasome genes in response to CLas infection
Stringtie transcript	OGS ID	KEGG	Annotation	baseMean	log2FoldChange	pvalue	note
MSTRG.11215	Dcitr04g12230.1.1		Proteasome activator complex subunit 3 (AHRD V3.11 *-* tr|A0A0A9ZB09|A0A0A9ZB09_LYGHE)	700.225	10.3577	9.21843e-78	instar45-3up
MSTRG.14501	Dcitr06g04970.1.1	K02737	Proteasome subunit beta (AHRD V3.11 *** tr|W7TGK8|W7TGK8_9STRA) | IPR001353,PF00227,GO:0004298,GO:0005839,GO:0051603	480.473	10.0124	1.94849e-47	instar45-3up
MSTRG.4740	Dcitr01g21230.1.1	K18405	E3 ubiquitin-protein ligase TRIM56 (AHRD V3.11 *-* tr|A0A0A9W1N9|A0A0A9W1N9_LYGHE)	39.6159	2.50213	1.34515e-05	Teneral-up
MSTRG.4994	Dcitr02g01290.1.1		E3 ubiquitin-protein ligase (AHRD V3.11 *-* tr|A0A0K8S862|A0A0K8S862_LYGHE)	24.1997	2.23374	1.94872e-07	instar45up
MSTRG.5298	Dcitr02g03080.1.1	K10649	E3 ubiquitin-protein ligase TRIM9 (AHRD V3.11 *-* tr|A0A0A9YR67|A0A0A9YR67_LYGHE)	944.859	2.12767	0.000275262	teneral-45up
MSTRG.4740	Dcitr01g21230.1.1	K18405	E3 ubiquitin-protein ligase TRIM56 (AHRD V3.11 *-* tr|A0A0A9W1N9|A0A0A9W1N9_LYGHE)	899.536	2.01662	5.75216e-07	teneral-45up
MSTRG.3667	Dcitr01g12420.1.1		Proteasome subunit beta (AHRD V3.11 *** tr|A0A0A9XFE5|A0A0A9XFE5_LYGHE) | IPR001353,PF00227,GO:0004298,GO:0005839,GO:0051603	951.178	1.84849	3.38749e-06	teneral-45up
MSTRG.7404	Dcitr03g01130.1.1		E3 ubiquitin-protein ligase (AHRD V3.11 *-* tr|A0A2K1KX96|A0A2K1KX96_PHYPA)	17.825	1.68938	1.79175e-07	instar45up
MSTRG.6511	Dcitr02g13370.1.1		E3 ubiquitin-protein ligase rkp-like protein (AHRD V3.11 *-* tr|A0A2K3PGT1|A0A2K3PGT1_TRIPR)	20.8615	1.53791	1.78912e-05	instar45up
MSTRG.11215	Dcitr04g12230.1.1	K06698	Proteasome activator complex subunit 3 (AHRD V3.11 *-* tr|A0A0A9ZB09|A0A0A9ZB09_LYGHE)	26.9854	1.27742	1.6139e-06	instar45up
MSTRG.14501	Dcitr06g04970.1.1	K02737	Proteasome subunit beta (AHRD V3.11 *** tr|W7TGK8|W7TGK8_9STRA) | IPR001353,PF00227,GO:0004298,GO:0005839,GO:0051603	18.0848	1.20179	0.000301738	instar45up
MSTRG.3667	Dcitr01g12420.1.1		Proteasome subunit beta (AHRD V3.11 *** tr|A0A0A9XFE5|A0A0A9XFE5_LYGHE) | IPR001353,PF00227,GO:0004298,GO:0005839,GO:0051603	4264.56	1.04747	9.47915e-07	Teneral-up
MSTRG.7404	Dcitr03g01130.1.1		E3 ubiquitin-protein ligase (AHRD V3.11 *-* tr|A0A2K1KX96|A0A2K1KX96_PHYPA)	16.8394	0.99437	0.00126475	instar3up
MSTRG.4994	Dcitr02g01290.1.1		E3 ubiquitin-protein ligase (AHRD V3.11 *-* tr|A0A0K8S862|A0A0K8S862_LYGHE)	22.853	0.934503	0.0105549	instar12up
MSTRG.17911	Dcitr08g04710.1.1	K10656	E3 ubiquitin-protein ligase MARCH8 (AHRD V3.11 *** tr|A0A0A9Y3F9|A0A0A9Y3F9_LYGHE)	84.4713	0.87005	7.69862e-05	Teneral-up
MSTRG.6628	Dcitr02g14200.1.2		E3 ubiquitin-protein ligase RBBP6-like isoform X1 (AHRD V3.11 *** gi|1494765034|ref|XP_026684741.1|)	105.843	0.841166	2.36816e-12	instar12up
MSTRG.10087	Dcitr04g02550.1.1		E3 ubiquitin-protein ligase (AHRD V3.11 *** tr|A0A0A9X9R2|A0A0A9X9R2_LYGHE)	268.165	0.805614	4.27291e-19	instar12up
MSTRG.9822	Dcitr03g21000.1.1		E3 ubiquitin-protein ligase RNF103 (AHRD V3.11 *-* gi|662221496|ref|XP_008484944.1|)	124.085	0.794726	0.000438411	Teneral-up
MSTRG.4994	Dcitr02g01290.1.1		E3 ubiquitin-protein ligase (AHRD V3.11 *-* tr|A0A0K8S862|A0A0K8S862_LYGHE)	24.5607	0.758114	0.00114017	instar3up
MSTRG.6508	Dcitr02g13360.1.2		E3 ubiquitin-protein ligase RKP (AHRD V3.11 *-* tr|A0A1U8EU57|A0A1U8EU57_CAPAN)	62.134	0.727899	0.00117904	instar45up
MSTRG.13592	Dcitr05g14640.1.1	K02732	Proteasome subunit beta (AHRD V3.11 *** tr|A0A1Z5KNH6|A0A1Z5KNH6_FISSO) | IPR001353,PF00227,GO:0004298,GO:0005839,GO:0051603	387.192	0.690856	0.00361761	Teneral-up
MSTRG.10087	Dcitr04g02550.1.1		E3 ubiquitin-protein ligase (AHRD V3.11 *** tr|A0A0A9X9R2|A0A0A9X9R2_LYGHE)	283.139	0.684951	1.22113e-17	instar3up
MSTRG.8410	Dcitr03g09080.1.1	K06699	Proteasome activator subunit 4 (AHRD V3.11 *** tr|A0A161VX70|A0A161VX70_9PEZI)	284.093	0.680429	6.93844e-13	instar45up
MSTRG.2018	Dcitr02g18010.1.1	K03039	26S proteasome non-ATPase regulatory subunit 13 (AHRD V3.11 *** tr|A0A0A9XLW8|A0A0A9XLW8_LYGHE)	217.086	0.664496	0.000174815	Teneral-up
MSTRG.8410	Dcitr03g09080.1.1	K06699	Proteasome activator subunit 4 (AHRD V3.11 *** tr|A0A161VX70|A0A161VX70_9PEZI)	195.289	0.638189	2.20724e-05	Teneral-up
MSTRG.21774	Dcitr11g02550.1.1	K18180	Proteasome endopeptidase complex (AHRD V3.11 *** tr|A0A183C3W4|A0A183C3W4_GLOPA)	89.9208	0.6338	8.77771e-06	Teneral-up
MSTRG.14541	Dcitr06g05360.1.1	K03037	26S proteasome non-ATPase regulatory subunit 6 (AHRD V3.11 *** tr|A0A0A9XID1|A0A0A9XID1_LYGHE)	676.388	0.624547	5.65659e-05	Teneral-up
MSTRG.4956	Dcitr02g01020.1.1		E3 ubiquitin-protein ligase HECTD1 (AHRD V3.11 *-* tr|A0A0A9WUW8|A0A0A9WUW8_LYGHE)	58.723	0.617083	0.00571429	instar45up
MSTRG.10087	Dcitr04g02550.1.1		E3 ubiquitin-protein ligase (AHRD V3.11 *** tr|A0A0A9X9R2|A0A0A9X9R2_LYGHE)	359.586	0.601722	1.11171e-14	instar45up
MSTRG.10087	Dcitr04g02550.1.1		E3 ubiquitin-protein ligase (AHRD V3.11 *** tr|A0A0A9X9R2|A0A0A9X9R2_LYGHE)	103.172	0.599899	0.00530054	Teneral-up
MSTRG.12344	Dcitr05g04530.1.1	K02729	Proteasome subunit alpha type (AHRD V3.11 *** tr|U9U0E9|U9U0E9_RHIID) | IPR001353,PF00227,GO:0004298,GO:0005839,GO:0051603	1038.42	0.583611	0.000537931	instar45-3up
MSTRG.7124	Dcitr02g18010.1.1	K03039	26S proteasome non-ATPase regulatory subunit 13 (AHRD V3.11 *** tr|A0A0A9XLW8|A0A0A9XLW8_LYGHE)	569.499	0.575989	3.31826e-06	Teneral-up
MSTRG.19849	Dcitr09g08160.1.1	K10590	E3	52.0342	0.572665	0.00452449	instar45up
MSTRG.17917	Dcitr08g04710.1.1		E3 ubiquitin-protein ligase MARCH8 (AHRD V3.11 *** tr|A0A0A9Y3F9|A0A0A9Y3F9_LYGHE)	2239.05	0.564912	0.00243181	Teneral-up
MSTRG.2018	Dcitr02g18010.1.1	K03039	26S proteasome non-ATPase regulatory subunit 13 (AHRD V3.11 *** tr|A0A0A9XLW8|A0A0A9XLW8_LYGHE)	240.538	0.523402	0.000150805	postTen-up
MSTRG.16118	Dcitr07g02800.1.1	K04678	E3 Ubiquitin Ligase Smurf | IPR001202,PF00397,GO:0005515	56.9721	0.508217	0.00315322	Teneral-up
MSTRG.17912	Dcitr08g04710.1.1	K10656	E3 ubiquitin-protein ligase MARCH8 (AHRD V3.11 *** tr|A0A0A9Y3F9|A0A0A9Y3F9_LYGHE)	263.679	0.506255	9.59659e-11	instar3up
MSTRG.6628	Dcitr02g14200.1.2		E3 ubiquitin-protein ligase RBBP6-like isoform X1 (AHRD V3.11 *** gi|1494765034|ref|XP_026684741.1|)	107.735	0.467214	0.00197654	instar45up
MSTRG.23040	Dcitr12g02570.1.3	K10608	E3 ubiquitin-protein ligase TRIM37 (AHRD V3.11 *-* tr|A0A0A9XXN8|A0A0A9XXN8_LYGHE)	185.026	0.452426	0.00129395	instar45up
MSTRG.17912	Dcitr08g04710.1.1	K10656	E3 ubiquitin-protein ligase MARCH8 (AHRD V3.11 *** tr|A0A0A9Y3F9|A0A0A9Y3F9_LYGHE)	191.052	0.451469	1.99509e-05	instar12up
MSTRG.15454	Dcitr06g12920.1.1	K06700	proteasome inhibitor PI31 subunit-like (AHRD V3.11 *-* gi|662214460|ref|XP_008481063.1|)	1083.24	0.450884	0.00178046	instar45-3up
MSTRG.5611	Dcitr02g05910.1.1	K10436	Proteasome subunit beta (AHRD V3.11 *** tr|A0A0K8S7L4|A0A0K8S7L4_LYGHE) | IPR001353,PF00227,GO:0004298,GO:0005839,GO:0051603	2117.01	0.431878	1.60583e-06	Teneral-up
MSTRG.14917	Dcitr06g08710.1.1	K05750	E3 ubiquitin-protein ligase listerin (AHRD V3.11 *-* tr|A0A146M5V2|A0A146M5V2_LYGHE)	854.519	0.421818	3.27328e-05	Teneral-up
MSTRG.15525	Dcitr06g13410.1.1	K16685	E3 ubiquitin-protein ligase (AHRD V3.11 *-* tr|F8NYY5|F8NYY5_SERL9)	450.265	0.408837	0.00416644	Teneral-up
MSTRG.19846	Dcitr09g08160.1.1	K10590	E3	295.464	0.407724	5.08149e-05	instar45up
MSTRG.4126	Dcitr01g16470.1.1		26S proteasome non-ATPase regulatory subunit 14 (AHRD V3.11 *** tr|A0A0A9Z932|A0A0A9Z932_LYGHE)	1273.85	0.405205	0.000461006	instar45-3up
MSTRG.17917	Dcitr08g04710.1.1		E3 ubiquitin-protein ligase MARCH8 (AHRD V3.11 *** tr|A0A0A9Y3F9|A0A0A9Y3F9_LYGHE)	3227.55	0.401512	8.50101e-07	instar3up
MSTRG.4126	Dcitr01g16470.1.1		26S proteasome non-ATPase regulatory subunit 14 (AHRD V3.11 *** tr|A0A0A9Z932|A0A0A9Z932_LYGHE)	2248.49	0.396341	0.000171087	Teneral-up
MSTRG.13592	Dcitr05g14640.1.1	K02732	Proteasome subunit beta (AHRD V3.11 *** tr|A0A1Z5KNH6|A0A1Z5KNH6_FISSO) | IPR001353,PF00227,GO:0004298,GO:0005839,GO:0051603	1710.47	0.395615	9.67945e-16	instar45-3up
MSTRG.14917	Dcitr06g08710.1.1	K05750	E3 ubiquitin-protein ligase listerin (AHRD V3.11 *-* tr|A0A146M5V2|A0A146M5V2_LYGHE)	1139.02	0.384148	1.38191e-18	instar45up
MSTRG.4998	Dcitr02g01320.1.1	K10591	E3 ubiquitin-protein ligase (AHRD V3.11 *-* tr|A0A0A9Z0S7|A0A0A9Z0S7_LYGHE)	1000.25	0.372559	0.000136949	instar45up
MSTRG.14917	Dcitr06g08710.1.1	K05750	E3 ubiquitin-protein ligase listerin (AHRD V3.11 *-* tr|A0A146M5V2|A0A146M5V2_LYGHE)	972.139	0.366699	5.71715e-08	instar12up
MSTRG.17917	Dcitr08g04710.1.1		E3 ubiquitin-protein ligase MARCH8 (AHRD V3.11 *** tr|A0A0A9Y3F9|A0A0A9Y3F9_LYGHE)	1244.74	0.364143	0.000361726	instar3-12up
MSTRG.9324	Dcitr03g16910.1.4		26S proteasome regulatory subunit (AHRD V3.11 *** tr|A8IHB3|A8IHB3_CHLRE)	240.339	0.349001	0.011367	Teneral-up
MSTRG.13598	Dcitr05g14710.1.1	K02732	Proteasome subunit beta (AHRD V3.11 *** tr|A0A1Z5KNH6|A0A1Z5KNH6_FISSO) | IPR001353,PF00227,GO:0004298,GO:0005839,GO:0051603	967.421	0.348557	2.30874e-10	instar3up
MSTRG.14653	Dcitr06g06390.1.1	K12813	Proteasome subunit alpha type (AHRD V3.11 *** tr|A0A146LTV6|A0A146LTV6_LYGHE) | IPR001353,PF00227,GO:0004298,GO:0005839,GO:0051603	1069.36	0.34513	0.000237884	Teneral-up
MSTRG.13160	Dcitr05g10920.1.1	K03237	E3 ubiquitin-protein ligase rkp-like protein (AHRD V3.11 *-* tr|A0A2K3PGT1|A0A2K3PGT1_TRIPR)	1168.29	0.332854	0.000598905	Teneral-up
MSTRG.15460	Dcitr06g12960.1.1	K18083	Proteasome inhibitor PI31 subunit (AHRD V3.11 *** sp|Q92530|PSMF1_HUMAN)	1266.32	0.324847	0.000613356	instar45-3up
MSTRG.9326	Dcitr03g16910.1.3	K03062	26S proteasome regulatory subunit (AHRD V3.11 *** tr|A8IHB3|A8IHB3_CHLRE)	1956.98	0.320559	0.00711224	Teneral-up
MSTRG.17911	Dcitr08g04710.1.1	K10656	E3 ubiquitin-protein ligase MARCH8 (AHRD V3.11 *** tr|A0A0A9Y3F9|A0A0A9Y3F9_LYGHE)	146.532	0.320222	0.00891096	instar45up
MSTRG.5467	Dcitr02g04840.1.1	K11978	E3 ubiquitin-protein ligase UBR3 (AHRD V3.11 *** tr|A0A0A9Y5B1|A0A0A9Y5B1_LYGHE)	1055.18	0.30845	0.000124111	instar45up
MSTRG.5793	Dcitr02g07380.1.1	K06698	Proteasome activator complex subunit 3 (AHRD V3.11 *** tr|A0A0A9ZB09|A0A0A9ZB09_LYGHE) | IPR003186,PF02252,GO:0008537	1595.4	0.289981	5.04176e-05	instar45-3up
MSTRG.12344	Dcitr05g04530.1.1	K02729	Proteasome subunit alpha type (AHRD V3.11 *** tr|U9U0E9|U9U0E9_RHIID) | IPR001353,PF00227,GO:0004298,GO:0005839,GO:0051603	1980.42	0.28843	0.010747	Teneral-up
MSTRG.11619	Dcitr04g15450.1.1	K05633	E3 ubiquitin-protein ligase (AHRD V3.11 *** tr|A0A0A9WSH2|A0A0A9WSH2_LYGHE)	453.291	0.286241	0.0155874	Teneral-up
MSTRG.3667	Dcitr01g12420.1.1		Proteasome subunit beta (AHRD V3.11 *** tr|A0A0A9XFE5|A0A0A9XFE5_LYGHE) | IPR001353,PF00227,GO:0004298,GO:0005839,GO:0051603	13653.5	0.28061	2.90573e-21	instar45up
MSTRG.10212	Dcitr04g03690.1.1	K03038	26S proteasome non-ATPase regulatory subunit 7 (AHRD V3.11 *** tr|A0A0A9XNE7|A0A0A9XNE7_LYGHE)	1369.08	0.276295	0.00389969	Teneral-up
MSTRG.20516	Dcitr10g04070.1.2	K10666	E3 ubiquitin-protein ligase (AHRD V3.11 *-* tr|A0A2G3D341|A0A2G3D341_CAPCH)	561.081	0.269984	0.00602567	Teneral-up
MSTRG.2767	Dcitr01g04810.1.1	K18189	26S proteasome regulatory subunit (AHRD V3.11 *** tr|A8IV67|A8IV67_CHLRE)	1211.81	0.266583	0.00249264	Teneral-up
MSTRG.21774	Dcitr11g02550.1.1	K18180	Proteasome endopeptidase complex (AHRD V3.11 *** tr|A0A183C3W4|A0A183C3W4_GLOPA)	194.088	0.261952	0.0136943	instar45up
MSTRG.4998	Dcitr02g01320.1.1	K10591	E3 ubiquitin-protein ligase (AHRD V3.11 *-* tr|A0A0A9Z0S7|A0A0A9Z0S7_LYGHE)	792.483	0.259869	0.0164962	instar12up
MSTRG.24097	Dcitr13g01260.1.1		E3 ubiquitin protein ligase (AHRD V3.11 *-* tr|A0A1Y1IH82|A0A1Y1IH82_KLENI)	658.983	0.256074	0.00107956	Teneral-up
MSTRG.7078	Dcitr02g17730.1.1	K12168	E3 ubiquitin-protein ligase HECW2 (AHRD V3.11 *-* tr|A0A146M7C1|A0A146M7C1_LYGHE)	354.743	0.255547	0.000165373	instar3up
MSTRG.13824	Dcitr05g16310.1.1	K11981	E3 ubiquitin-protein ligase NRDP1 (AHRD V3.11 *** tr|A0A0A9W4D3|A0A0A9W4D3_LYGHE) | IPR015036,PF08941,GO:0016567,GO:0061630	261.381	0.253348	0.00767756	instar12up
MSTRG.17917	Dcitr08g04710.1.1		E3 ubiquitin-protein ligase MARCH8 (AHRD V3.11 *** tr|A0A0A9Y3F9|A0A0A9Y3F9_LYGHE)	2022.23	0.248734	0.0123179	instar12up
MSTRG.5611	Dcitr02g05910.1.1	K10436	Proteasome subunit beta (AHRD V3.11 *** tr|A0A0K8S7L4|A0A0K8S7L4_LYGHE) | IPR001353,PF00227,GO:0004298,GO:0005839,GO:0051603	1524.98	0.242215	5.79554e-05	instar45-3up
MSTRG.5611	Dcitr02g05910.1.1	K10436	Proteasome subunit beta (AHRD V3.11 *** tr|A0A0K8S7L4|A0A0K8S7L4_LYGHE) | IPR001353,PF00227,GO:0004298,GO:0005839,GO:0051603	1307.73	0.227933	0.000778708	instar3-12up
MSTRG.13598	Dcitr05g14710.1.1	K02732	Proteasome subunit beta (AHRD V3.11 *** tr|A0A1Z5KNH6|A0A1Z5KNH6_FISSO) | IPR001353,PF00227,GO:0004298,GO:0005839,GO:0051603	744.971	0.221828	4.47835e-05	instar12up
MSTRG.21774	Dcitr11g02550.1.1	K18180	Proteasome endopeptidase complex (AHRD V3.11 *** tr|A0A183C3W4|A0A183C3W4_GLOPA)	181.468	0.215401	0.0159602	instar3up
MSTRG.17917	Dcitr08g04710.1.1		E3 ubiquitin-protein ligase MARCH8 (AHRD V3.11 *** tr|A0A0A9Y3F9|A0A0A9Y3F9_LYGHE)	4202.05	0.214543	0.00166907	instar45up
MSTRG.4106	Dcitr01g16230.1.1		Proteasome-associated protein ECM29 (AHRD V3.11 *** tr|A0A146MF04|A0A146MF04_LYGHE)	1579.31	0.197034	1.55241e-06	instar45up
MSTRG.5611	Dcitr02g05910.1.1	K10436	Proteasome subunit beta (AHRD V3.11 *** tr|A0A0K8S7L4|A0A0K8S7L4_LYGHE) | IPR001353,PF00227,GO:0004298,GO:0005839,GO:0051603	3431.51	0.193596	3.35857e-07	instar3up
MSTRG.10087	Dcitr04g02550.1.1		E3 ubiquitin-protein ligase (AHRD V3.11 *** tr|A0A0A9X9R2|A0A0A9X9R2_LYGHE)	1450.8	0.184029	1.34312e-05	instar45-3up
MSTRG.14917	Dcitr06g08710.1.1	K05750	E3 ubiquitin-protein ligase listerin (AHRD V3.11 *-* tr|A0A146M5V2|A0A146M5V2_LYGHE)	1092.39	0.179073	2.75672e-05	instar3up
MSTRG.7078	Dcitr02g17730.1.1	K12168	E3 ubiquitin-protein ligase HECW2 (AHRD V3.11 *-* tr|A0A146M7C1|A0A146M7C1_LYGHE)	295.644	0.174368	0.01924	instar45up
MSTRG.4212	Dcitr01g17230.1.3	K16687	E3 ubiquitin-protein ligase (AHRD V3.11 *-* tr|A8PR54|A8PR54_MALGO)	1068.78	0.174136	0.0046246	instar12up
MSTRG.4958	Dcitr02g01030.1.1	K12231	E3 ubiquitin-protein ligase HECTD1 (AHRD V3.11 *-* tr|A0A0A9WTZ3|A0A0A9WTZ3_LYGHE)	1074.7	0.169808	0.0218094	instar45up
MSTRG.15525	Dcitr06g13410.1.1	K16685	E3 ubiquitin-protein ligase (AHRD V3.11 *-* tr|F8NYY5|F8NYY5_SERL9)	791.085	0.161668	0.0171556	instar45up
MSTRG.8386	Dcitr03g08730.1.1	K02727	Proteasome subunit alpha type (AHRD V3.11 *** tr|A0A0A9YLA3|A0A0A9YLA3_LYGHE) | IPR001353,PF00227,GO:0004298,GO:0005839,GO:0051603	1294.39	0.154524	0.00168618	instar3-12up
MSTRG.3667	Dcitr01g12420.1.1		Proteasome subunit beta (AHRD V3.11 *** tr|A0A0A9XFE5|A0A0A9XFE5_LYGHE) | IPR001353,PF00227,GO:0004298,GO:0005839,GO:0051603	10548	0.138548	1.89756e-07	instar12up
MSTRG.4212	Dcitr01g17230.1.3	K16687	E3 ubiquitin-protein ligase (AHRD V3.11 *-* tr|A8PR54|A8PR54_MALGO)	1485.13	0.128772	0.00513544	instar3up
MSTRG.13160	Dcitr05g10920.1.1	K03237	E3 ubiquitin-protein ligase rkp-like protein (AHRD V3.11 *-* tr|A0A2K3PGT1|A0A2K3PGT1_TRIPR)	1756.21	0.113897	0.0147893	instar3up
MSTRG.3667	Dcitr01g12420.1.1		Proteasome subunit beta (AHRD V3.11 *** tr|A0A0A9XFE5|A0A0A9XFE5_LYGHE) | IPR001353,PF00227,GO:0004298,GO:0005839,GO:0051603	12721.3	0.0858582	0.0171582	instar3up
MSTRG.14653	Dcitr06g06390.1.1	K12813	Proteasome subunit alpha type (AHRD V3.11 *** tr|A0A146LTV6|A0A146LTV6_LYGHE) | IPR001353,PF00227,GO:0004298,GO:0005839,GO:0051603	1609.91	-0.105098	0.00622347	instar45down
MSTRG.2767	Dcitr01g04810.1.1	K18189	26S proteasome regulatory subunit (AHRD V3.11 *** tr|A8IV67|A8IV67_CHLRE)	1233.23	-0.129579	0.00237008	instar12down
MSTRG.7072	Dcitr02g17650.1.1	K20407	E3 ubiquitin-protein ligase (AHRD V3.11 *-* tr|A0A1I7SST2|A0A1I7SST2_BURXY)	1679.17	-0.139136	4.39234e-08	instar45-3down
MSTRG.13160	Dcitr05g10920.1.1	K03237	E3 ubiquitin-protein ligase rkp-like protein (AHRD V3.11 *-* tr|A0A2K3PGT1|A0A2K3PGT1_TRIPR)	2146.08	-0.143871	0.0141515	instar45down
MSTRG.12343	Dcitr05g04520.1.1	K02738	Proteasome subunit beta (AHRD V3.11 *** tr|R7Q3I5|R7Q3I5_CHOCR) | IPR001353,PF00227,GO:0004298,GO:0005839,GO:0051603	2125.75	-0.149049	0.00287035	instar45down
MSTRG.8386	Dcitr03g08730.1.1	K02727	Proteasome subunit alpha type (AHRD V3.11 *** tr|A0A0A9YLA3|A0A0A9YLA3_LYGHE) | IPR001353,PF00227,GO:0004298,GO:0005839,GO:0051603	2674.94	-0.152967	0.0113411	instar12down
MSTRG.7771	Dcitr03g03620.1.1	K15174	26S proteasome non-ATPase regulatory subunit 4 (AHRD V3.11 *** tr|A0A146L4F4|A0A146L4F4_LYGHE)	2667.78	-0.153473	0.000777799	instar12down
MSTRG.7771	Dcitr03g03620.1.1	K15174	26S proteasome non-ATPase regulatory subunit 4 (AHRD V3.11 *** tr|A0A146L4F4|A0A146L4F4_LYGHE)	3257.11	-0.163499	0.000553586	instar3down
MSTRG.11418	Dcitr04g14330.1.1	K02739	Proteasome subunit beta (AHRD V3.11 *** tr|A0A1J3ERE0|A0A1J3ERE0_NOCCA) | IPR001353,PF00227,GO:0004298,GO:0005839,GO:0051603	821.419	-0.175412	0.000921825	instar45down
MSTRG.7072	Dcitr02g17650.1.1	K20407	E3 ubiquitin-protein ligase (AHRD V3.11 *-* tr|A0A1I7SST2|A0A1I7SST2_BURXY)	478.697	-0.178782	0.00614236	instar45down
MSTRG.7072	Dcitr02g17650.1.1	K20407	E3 ubiquitin-protein ligase (AHRD V3.11 *-* tr|A0A1I7SST2|A0A1I7SST2_BURXY)	565.976	-0.185592	0.0018417	instar3down
MSTRG.6091	Dcitr02g09710.1.1		E3 ubiquitin ligase PARAQUAT TOLERANCE 3-like (AHRD V3.11 *-* gi|1494739020|ref|XP_026676184.1|)	4627.27	-0.185677	1.73538e-05	instar3down
MSTRG.9326	Dcitr03g16910.1.3	K03062	26S proteasome regulatory subunit (AHRD V3.11 *** tr|A8IHB3|A8IHB3_CHLRE)	2782.21	-0.186065	3.33391e-05	instar45down
MSTRG.7078	Dcitr02g17730.1.1	K12168	E3 ubiquitin-protein ligase HECW2 (AHRD V3.11 *-* tr|A0A146M7C1|A0A146M7C1_LYGHE)	1363.15	-0.205599	2.41164e-07	instar45-3down
MSTRG.5793	Dcitr02g07380.1.1	K06698	Proteasome activator complex subunit 3 (AHRD V3.11 *** tr|A0A0A9ZB09|A0A0A9ZB09_LYGHE) | IPR003186,PF02252,GO:0008537	413.04	-0.20584	0.0011071	instar3down
MSTRG.11619	Dcitr04g15450.1.1	K05633	E3 ubiquitin-protein ligase (AHRD V3.11 *** tr|A0A0A9WSH2|A0A0A9WSH2_LYGHE)	597.584	-0.208279	0.0192765	instar45down
MSTRG.14358	Dcitr06g03790.1.1	K02737	Proteasome subunit beta (AHRD V3.11 *** tr|A0A0A9YVV6|A0A0A9YVV6_LYGHE) | IPR001353,PF00227,GO:0004298,GO:0005839,GO:0051603	1177.82	-0.213999	0.000303414	instar12down
MSTRG.5776	Dcitr02g07280.1.1	K06698	Proteasome activator complex subunit 3 (AHRD V3.11 *** tr|A0A0A9ZB09|A0A0A9ZB09_LYGHE) | IPR003186,PF02252,GO:0008537	1044.93	-0.215787	0.000197796	instar12down
MSTRG.13592	Dcitr05g14640.1.1	K02732	Proteasome subunit beta (AHRD V3.11 *** tr|A0A1Z5KNH6|A0A1Z5KNH6_FISSO) | IPR001353,PF00227,GO:0004298,GO:0005839,GO:0051603	416.567	-0.242484	0.000155772	instar12down
MSTRG.6091	Dcitr02g09710.1.1		E3 ubiquitin ligase PARAQUAT TOLERANCE 3-like (AHRD V3.11 *-* gi|1494739020|ref|XP_026676184.1|)	3014.16	-0.272819	2.64499e-11	instar45down
MSTRG.2767	Dcitr01g04810.1.1	K18189	26S proteasome regulatory subunit (AHRD V3.11 *** tr|A8IV67|A8IV67_CHLRE)	1951.05	-0.276658	4.0101e-10	instar45down
MSTRG.19665	Dcitr09g06800.1.4	K15692	E3	520.074	-0.276715	4.61115e-07	instar3down
MSTRG.19367	Dcitr09g04740.1.1	K19526	E3	356.933	-0.285624	0.0108911	Teneral-down
MSTRG.6091	Dcitr02g09710.1.1		E3 ubiquitin ligase PARAQUAT TOLERANCE 3-like (AHRD V3.11 *-* gi|1494739020|ref|XP_026676184.1|)	6411.03	-0.296963	0.00102071	instar12down
MSTRG.7072	Dcitr02g17650.1.1	K20407	E3 ubiquitin-protein ligase (AHRD V3.11 *-* tr|A0A1I7SST2|A0A1I7SST2_BURXY)	519.319	-0.315786	3.03613e-06	instar12down
MSTRG.20516	Dcitr10g04070.1.2	K10666	E3 ubiquitin-protein ligase (AHRD V3.11 *-* tr|A0A2G3D341|A0A2G3D341_CAPCH)	448.531	-0.331263	3.5803e-06	instar45down
MSTRG.14543	Dcitr06g05360.1.1	K02974	26S proteasome non-ATPase regulatory subunit 6 (AHRD V3.11 *** tr|A0A0A9XID1|A0A0A9XID1_LYGHE)	4106.64	-0.343278	0.00483287	Teneral-down
MSTRG.4217	Dcitr01g17230.1.1	K16687	E3 ubiquitin-protein ligase (AHRD V3.11 *-* tr|A8PR54|A8PR54_MALGO)	89.6731	-0.369341	0.00671948	instar3down
MSTRG.14358	Dcitr06g03790.1.1	K02737	Proteasome subunit beta (AHRD V3.11 *** tr|A0A0A9YVV6|A0A0A9YVV6_LYGHE) | IPR001353,PF00227,GO:0004298,GO:0005839,GO:0051603	1916.85	-0.394181	6.36794e-11	instar45down
MSTRG.14543	Dcitr06g05360.1.1	K02974	26S proteasome non-ATPase regulatory subunit 6 (AHRD V3.11 *** tr|A0A0A9XID1|A0A0A9XID1_LYGHE)	6753.21	-0.399544	3.82837e-07	instar45down
MSTRG.4958	Dcitr02g01030.1.1	K12231	E3 ubiquitin-protein ligase HECTD1 (AHRD V3.11 *-* tr|A0A0A9WTZ3|A0A0A9WTZ3_LYGHE)	691.96	-0.403137	0.00529251	Teneral-down
MSTRG.8386	Dcitr03g08730.1.1	K02727	Proteasome subunit alpha type (AHRD V3.11 *** tr|A0A0A9YLA3|A0A0A9YLA3_LYGHE) | IPR001353,PF00227,GO:0004298,GO:0005839,GO:0051603	4441.62	-0.406129	1.86364e-06	instar45down
MSTRG.15454	Dcitr06g12920.1.1	K06700	proteasome inhibitor PI31 subunit-like (AHRD V3.11 *-* gi|662214460|ref|XP_008481063.1|)	356.137	-0.415133	1.37822e-08	instar45down
MSTRG.19568	Dcitr09g06200.1.1		Proteasome	200.633	-0.417851	6.00036e-07	instar45down
MSTRG.13592	Dcitr05g14640.1.1	K02732	Proteasome subunit beta (AHRD V3.11 *** tr|A0A1Z5KNH6|A0A1Z5KNH6_FISSO) | IPR001353,PF00227,GO:0004298,GO:0005839,GO:0051603	467.945	-0.433064	1.23201e-08	instar3down
MSTRG.19568	Dcitr09g06200.1.1		Proteasome	179.919	-0.442252	2.58883e-05	instar3down
MSTRG.6091	Dcitr02g09710.1.1		E3 ubiquitin ligase PARAQUAT TOLERANCE 3-like (AHRD V3.11 *-* gi|1494739020|ref|XP_026676184.1|)	1356.46	-0.443131	3.31278e-18	instar45-3down
MSTRG.5793	Dcitr02g07380.1.1	K06698	Proteasome activator complex subunit 3 (AHRD V3.11 *** tr|A0A0A9ZB09|A0A0A9ZB09_LYGHE) | IPR003186,PF02252,GO:0008537	305.833	-0.456373	8.86217e-08	instar12down
MSTRG.5776	Dcitr02g07280.1.1	K06698	Proteasome activator complex subunit 3 (AHRD V3.11 *** tr|A0A0A9ZB09|A0A0A9ZB09_LYGHE) | IPR003186,PF02252,GO:0008537	1954.93	-0.458967	1.14377e-05	instar45down
MSTRG.4740	Dcitr01g21230.1.1	K18405	E3 ubiquitin-protein ligase TRIM56 (AHRD V3.11 *-* tr|A0A0A9W1N9|A0A0A9W1N9_LYGHE)	137.353	-0.462555	4.19493e-05	instar3down
MSTRG.23040	Dcitr12g02570.1.3	K10608	E3 ubiquitin-protein ligase TRIM37 (AHRD V3.11 *-* tr|A0A0A9XXN8|A0A0A9XXN8_LYGHE)	1094.48	-0.48239	0.0100422	Teneral-down
MSTRG.5793	Dcitr02g07380.1.1	K06698	Proteasome activator complex subunit 3 (AHRD V3.11 *** tr|A0A0A9ZB09|A0A0A9ZB09_LYGHE) | IPR003186,PF02252,GO:0008537	645.749	-0.51062	1.85795e-09	instar45down
MSTRG.5793	Dcitr02g07380.1.1	K06698	Proteasome activator complex subunit 3 (AHRD V3.11 *** tr|A0A0A9ZB09|A0A0A9ZB09_LYGHE) | IPR003186,PF02252,GO:0008537	447.125	-0.511225	0.00156736	postTen-down
MSTRG.20517	Dcitr10g04070.1.2		E3 ubiquitin-protein ligase (AHRD V3.11 *-* tr|A0A2G3D341|A0A2G3D341_CAPCH)	77.2059	-0.573443	0.000866197	instar3down
MSTRG.20864	Dcitr10g06680.1.1	K10696	E3 ubiquitin protein ligase (AHRD V3.11 *-* tr|A0A146LA68|A0A146LA68_LYGHE)	1458.74	-0.609672	0.000952887	Teneral-down
MSTRG.14501	Dcitr06g04970.1.1	K02737	Proteasome subunit beta (AHRD V3.11 *** tr|W7TGK8|W7TGK8_9STRA) | IPR001353,PF00227,GO:0004298,GO:0005839,GO:0051603	360.057	-0.703622	0.000926278	postTen-down
MSTRG.20517	Dcitr10g04070.1.2		E3 ubiquitin-protein ligase (AHRD V3.11 *-* tr|A0A2G3D341|A0A2G3D341_CAPCH)	74.3514	-0.88254	1.50088e-06	instar12down
MSTRG.6612	Dcitr02g14220.1.1		E3 ubiquitin-protein ligase RBBP6-like isoform X2 (AHRD V3.11 *-* gi|1494765036|ref|XP_026684742.1|)	1023.75	-1.30837	0.000575037	instar3-12down
MSTRG.10087	Dcitr04g02550.1.1		E3 ubiquitin-protein ligase (AHRD V3.11 *** tr|A0A0A9X9R2|A0A0A9X9R2_LYGHE)	891.594	-1.66076	0.000295089	teneral-45down
MSTRG.4740	Dcitr01g21230.1.1	K18405	E3 ubiquitin-protein ligase TRIM56 (AHRD V3.11 *-* tr|A0A0A9W1N9|A0A0A9W1N9_LYGHE)	932.832	-1.85453	0.00321125	instar45-3down

## Sheet: 8-KEGG
Additional file 8: KEGG pathway differentially expressed genes in response to CLas infection
KEGG pathway		I1-2Up	I1-2Down	I3Up	I3Down	I4-5Up	I4-5Down	TA-Up	TA-Down	PTA-Up	PTA-Down	Total
Metabolic	Biosynthesis of secondary metabolites	61	71	56	71	69	101	101	45	26	11	612
	Fatty acid metabolism	7	17	9	15	10	18	15	6	2	3	102
	Biosynthesis of amino acids	12	12	9	10	15	16	22	13	7	0	116
	Glycolysis / Gluconeogenesis	6	9	7	13	10	14	11	6	6	3	85
	Starch and sucrose metabolism	5	5	3	8	4	8	6	2	3	1	45
	Oxidative phosphorylation	20	29	25	18	17	25	53	4	25	0	216
	Cutin, suberine and wax biosynthesis	1	1	1	1	1	1	1	1	1	1	10
	Purine metabolism	16	10	11	19	20	16	16	15	4	1	128
	Pyrimidine metabolism	10	5	5	7	9	12	12	3	3	0	66
	Terpenoid backbone biosynthesis	8	5	6	4	7	10	9	1	1	2	53
	Insect hormone biosynthesis	3	4	3	4	3	5	2	2	1	1	28
	Phenylpropanoid biosynthesis	1	2	0	2	0	1	2	0	0	0	8
	Metabolism of xenobiotics by cytochrome P450	1	3	2	2	4	4	3	3	1	1	24
Genetic	Ribosome	9	39	18	27	3	81	14	62	2	5	260
	RNA transport	14	18	23	19	11	44	18	16	3	1	167
	mRNA surveillance pathway	7	12	11	13	8	19	12	8	2	1	93
	Ubiquitin mediated proteolysis	15	9	12	12	16	18	22	6	0	0	110
	Proteasome	5	8	12	3	4	13	16	1	4	3	69
	RNA degradation	8	8	12	7	12	19	10	7	4	2	89
Environmental	ABC transporters	3	5	3	5	8	5	5	4	0	0	38
	Ras signaling pathway	19	7	13	7	18	8	17	10	3	2	104
	Rap1 signaling pathway	21	10	20	12	23	12	21	5	4	1	129
	MAPK signaling pathway	15	9	17	12	27	8	21	10	3	1	123
	Wnt signaling pathway	12	2	13	8	16	8	14	4	1	1	79
	Hippo signaling pathway	8	6	17	8	17	8	15	5	1	2	87
	JAK-STAT signaling pathway	4	0	4	2	2	1	3	3	1	1	21
	Calcium signaling pathway	21	7	19	10	27	8	14	8	5	1	120
	cAMP signaling pathway	28	9	18	11	26	9	17	9	3	1	131
	AMPK signaling pathway	12	9	10	14	9	14	17	8	1	2	96
Cellular	Endocytosis	21	18	23	16	19	30	46	7	4	1	185
	Phagosome	15	8	16	5	14	11	19	4	4	1	97
	Lysosome	15	22	12	22	17	18	22	14	8	2	152
	Peroxisome	12	13	10	12	11	19	16	6	8	1	108
	Autophagy	18	8	17	9	21	16	23	5	4	2	123
	Cell cycle	12	7	13	5	9	15	9	2	0	2	74
	Apoptosis	12	8	13	12	13	11	13	4	2	2	90
	Necroptosis	11	8	10	11	11	13	16	4	2	2	88
	Focal adhesion	23	8	20	10	24	10	24	5	8	2	134
	Biofilm formation	1	1	1	1	2	1	1	1	1	0	10
	Regulation of actin cytoskeleton	17	10	21	13	20	12	26	5	3	3	130
	Toll and Imd signaling pathway	9	6	8	4	6	6	10	3	3	0	55
	Antigen processing and presentation	4	4	5	5	5	5	7	3	2	2	42
	Salivary secretion	12	4	8	5	17	5	7	4	1	0	63
	Plant-pathogen interaction	3	2	4	1	5	5	4	1	1	1	27
		537	458	540	475	590	683	732	335	168	69	4587
